# Supplementary material for: An Endoplasmic Reticulum CREC Family Protein Regulates the Egress Proteolytic Cascade in Malaria Parasites
Source: PubMed Central journal article supplement (PMC7042697; doi:10.1128/mbio.03078-19), 2020-02-25
Supplement: mBio.03078-19-sf001.pdf [file mBio.03078-19-sf001.pdf]

PfERC 1 -----MMKINLY-----KLLCFICVIFLL-----HKNVVRS-----GDNMKYN  
Cab45 1 MVWPWVAMASRWGPLIGLAPCCLWLLGAVLLMDASARPANHSSITREVRVANREENEILPPD  
ERC55 1 -----MRLGPR-----TAALGLLLLCAA-----AAGAGKA-----EE-LHY-  
RCN1 1 -----MARGGRGRRL-----GLALGLLLALVLAPRVLRAKPTVVRK-----ERVVRPD  
RCN3 1 -----MMWRPS-----VLLLLLLLRHGAQGKPSPDAGPHGQ-----GR-VHQA  
Calumenin 1 -----MDLRQF-----LMCLSLCTAFAL-----SKPTEKK-----DR-VHHE

PfERC 34 DMKGL---DDLSKLNDDQVKDILG-----LTKIDGAKERIEKLFHLID--KNNDKK  
Cab45 61 HLNGVKLEMDGHLNRGFHQEVFLG-KDLGGFDEDAEPRRSRRKLMVIFSKVD--VNTDRK  
ERC55 31 -PLGER-----RSDYDREALLGVOEDVDEYVKLGHEEQKRLQAIKKID--LSDGDF  
RCN1 43 SELGERPPEDNQ-SFOYDHEAFLG-KEDSKTFDQLTPDESKERLGKIVDRID--NDGDGF  
RCN3 38 APLSDAPHDDAHGNFQYDHEAFLG-REVAKEFDQLTPPEESQARLGRIVDRMDRAGDGDGW  
Calumenin 32 PQLSDKVHNDAAQ-SFDYDHDAFLG-AEEAKTFDQLTPPEESKERLGKIVSKID--GDKDGF

PfERC 79 ITEEEINWSSFLKNEIF---LKQVQAEMGQIDSDDKDGFISLNELNDAFAQNI DA-KE--  
Cab45 118 ISAKEMQRWIMEKTAEHFQEAMEESKTHFRAVDPDGDGHVSWDEYKVKFLASKGH-SEKE  
ERC55 81 LTESELSSWIQMSFKHYA---MQEAKQQFVEYDKNSDDTVTWDEYNIQMYDRVIDFDENT  
RCN1 99 VTTEELKTWIKRVQKRYI---FDNVAKVWKDYDRDKDDKISWEEYKQATYGYLGNPAE  
RCN3 97 VSLAELRAWIAHTOQRHI---RDSVSAAWDTYDTRDRGVRGWEEELRNATYGHYAP-GE-E  
Calumenin 88 VTVDELKDWIKFAQKRWI---YEDVERQWKGHDLNEDGLVSWEEYKNATYGYVLD-DP--

PfERC 133 -----VEKHSEGLL-----KRFQIVDKDKDGKLSINEVGLLIDPMKDEELKEL  
Cab45 177 VADAIRLNEELKVDEETQEVLENLKDWRVYQADSPPADLLLTEEEFLSFLHPEHSRGM LRF  
ERC55 138 ALDD-----AEESFRKLHLKDKKRFKANKQDSGPGLSLEEFIAFEHPPEEVDYMTF  
RCN1 155 FHDS-----SDHHTFKKMLPRDERRFKAADLNGDLTATREEFTAFHLPPEEFHMKEI  
RCN3 152 FHDV-----EDAETYKKMLARDERRFRVADQDGDGSMATREELTAFHLPPEEFPHMRDI  
Calumenin 142 --DP-----DDGFNYKQMMVRDERRFKMADKDGDLIATKEEFTAFHLPPEEYDYMKDI

PfERC 176 EINEILEHHDVNKDGKISLDEF-----KQTRSDESSGVKKD-DEMALDDF-NEFDANKDGG  
Cab45 237 MVKEIVRDLDQDGDQKLSVPEFISLSPVGTVENQQGQDIDDNWVKDRKKEFEELI DSNHDG  
ERC55 190 VIQEALEEHDKNGDGFVSLEEFLL---GDYRWDPTANEDPEWILVEKDRFVNDYDKDNDG  
RCN1 207 VVLETLEDIDKNGDGFVDQDEYI---ADMFSHEENGPEPDWVLSEREQFNEFRDLNKDG  
RCN3 204 VIAETLEDLDRNKDGYVQVEEYI---ADLYSAEPGEPEPAWVQTERQQFRDFRDLNKDG  
Calumenin 192 VVQETMEDI DKNADGFIDLEEYI---GDMYSHDGNTDEPEWVKTEREQFVEFRDKNRDG

PfERC 229 FIDKEEIIKVYFDPAHESGAINVNEIKENIFEKKTITYDLWNEKALKI AVTSITDYGDVI  
Cab45 297 IVTAEELLES-YMDPMNEYNALN-----EAKQMIAVA DENQNHHLEPEEVLKYSEF-  
ERC55 246 RLDPQELLP-WVVPNNQGI AQE-----EALHLIDEMDLNGDKKLSEEEI LENPDL-  
RCN1 263 KLDKDEIRH-WILPQDYDHAQA-----EARHLVYESDKNKDEKLTKEEILENWNM-  
RCN3 260 HLDGSEVGH-WVLPPAQDQPLV-----EANHLLHESD TDKDGRLSKAEILGNWNM-  
Calumenin 248 KMDKEETKD-WILPSDYDHAEA-----EARHLVYESDQNKDGKLTKEEIVDKYDL-

PfERC 289 RYPEDFKLDIGKNVILPTARSRAFE DDDMDADNTEDDKDEADDASQQKSPAIDEL  
Cab45 346 -FTGSKLVDYARSV-----HEEF  
ERC55 295 -FLTSEATDYGRQLH-----DDYFYHDEL  
RCN1 312 -FVGSQATNYGEDLT-----KN--HDEL  
RCN3 309 -FVGSQATNYGEDLT-----RH--HDEL  
Calumenin 297 -FVGSQATDFGEALV-----R--HDEF
