# Supplementary material for: An Endoplasmic Reticulum CREC Family Protein Regulates the Egress Proteolytic Cascade in Malaria Parasites
Source: PubMed Central journal article supplement (PMC7042697; doi:10.1128/mbio.03078-19), 2020-02-25

**A**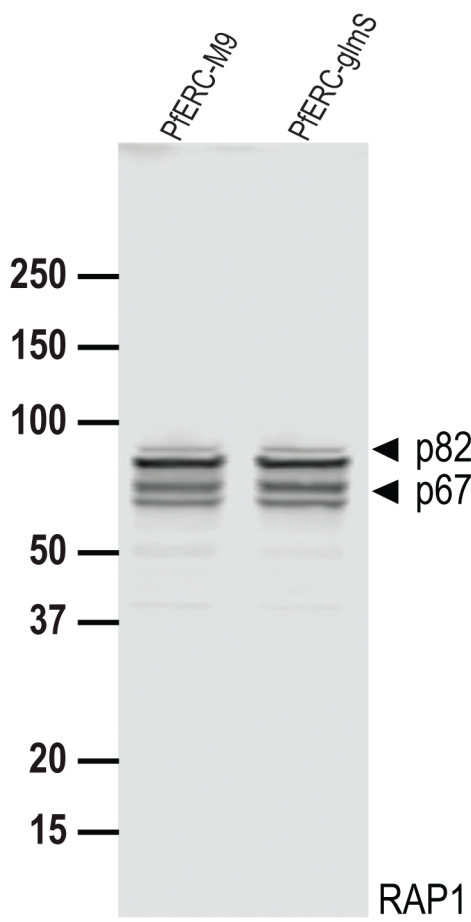**B**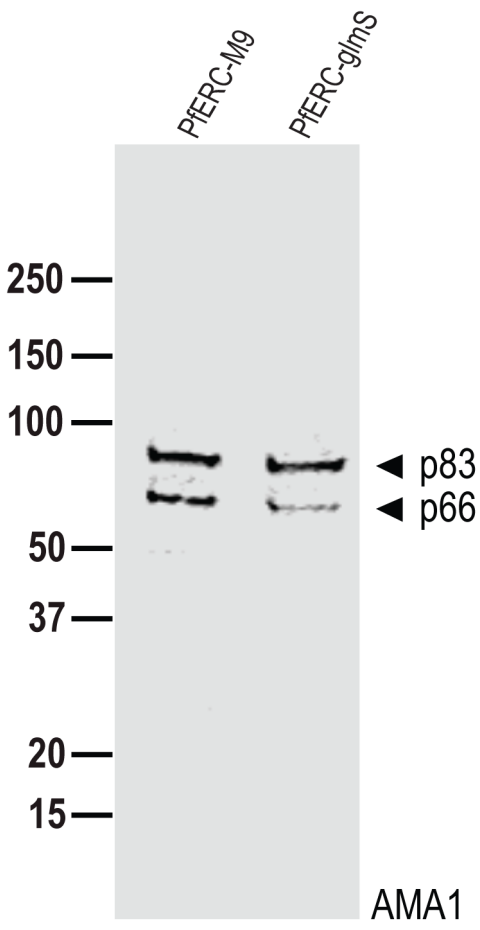**C**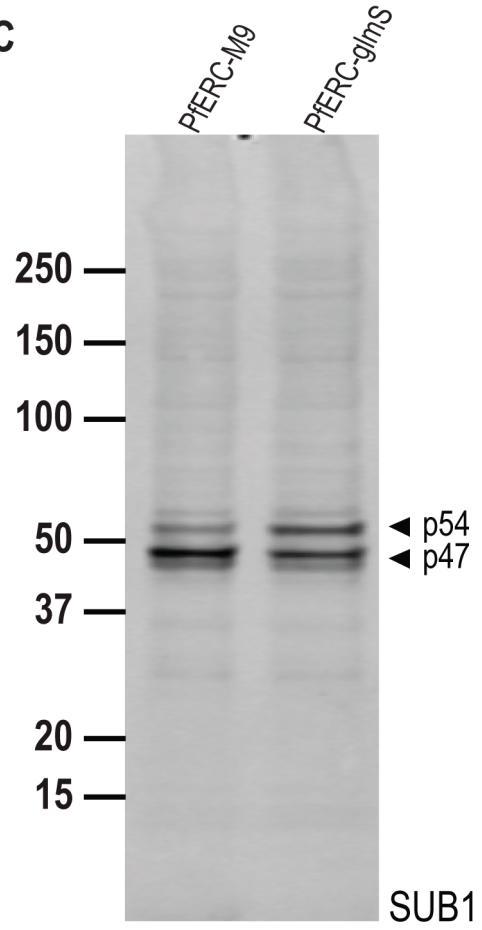**D**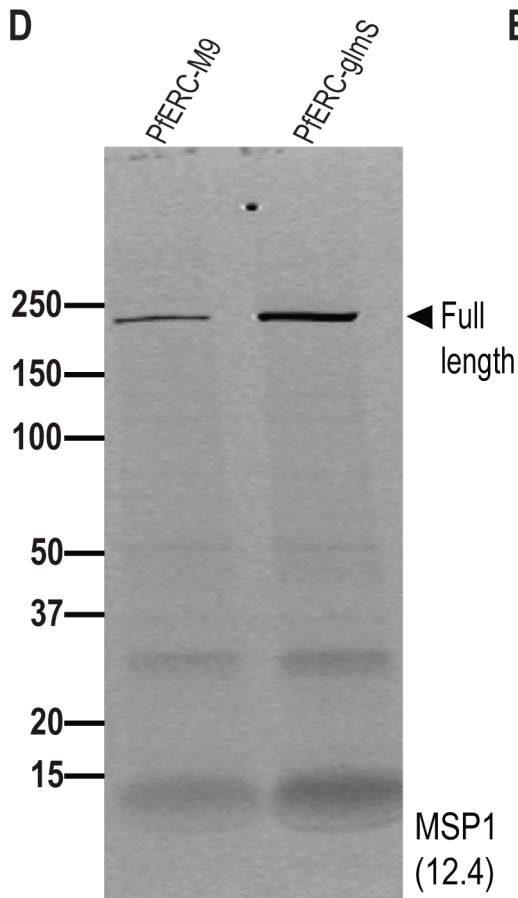**E**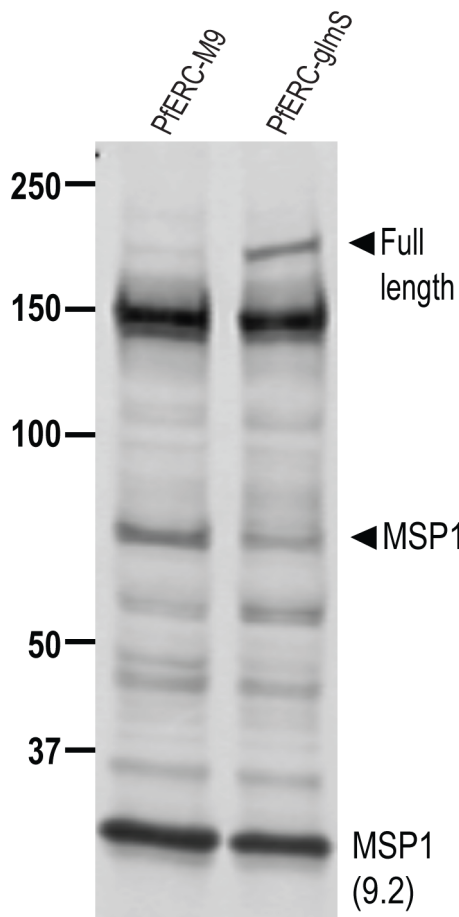**F**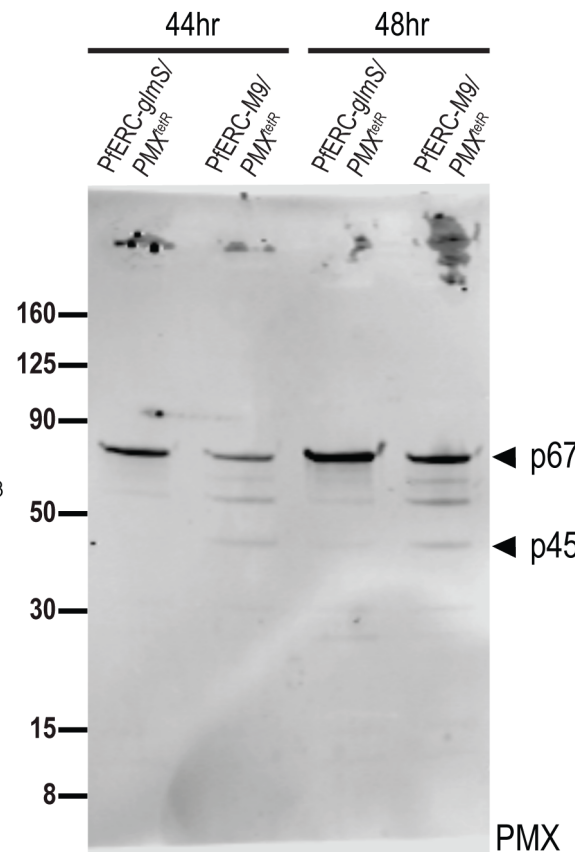

Supplement: mBio.03078-19-sf006.pdf [file mBio.03078-19-sf006.pdf]
